# Supplementary material for: Unveiling the mechanism of hydrotropy: evidence for water-mediated aggregation of hydrotropes around the solute
Source: Royal Society of Chemistry journal article supplement (doi:10.1039/d0cc03217d), 2020-01-01
Supplement: d0cc03217d1.pdf [file d0cc03217d1.pdf]

## Electronical Supplementary Information

### Unveiling the Mechanism of Hydrotropy: Evidence for Water-Mediated Aggregation of Hydrotropes Around the Solute

Dinis O. Abranches,<sup>a</sup> Jordana Benfica,<sup>a</sup> Bruna P. Soares,<sup>a</sup> Alejandro Leal-Duaso,<sup>b</sup> Tânia E. Sintra,<sup>a</sup> Elísabet Pires,<sup>b</sup> Simão P. Pinho,<sup>c</sup> Seishi Shimizu<sup>d</sup> and João A. P. Coutinho<sup>\*a</sup>

<sup>a</sup> CICECO – Aveiro Institute of Materials, Department of Chemistry, University of Aveiro, 3810-193 Aveiro, Portugal

<sup>b</sup> Instituto de Síntesis Química y Catálisis Homogénea (ISQCH-CSIC) Facultad de Ciencias, C.S.I.C. - Universidad de Zaragoza, E-50009 Zaragoza, Spain

<sup>c</sup> Centro de Investigação de Montanha (CIMO), Instituto Politécnico de Bragança. Campus de Santa Apolónia, 5300-253 Bragança, Portugal

<sup>d</sup> York Structural Biology Laboratory, Department of Chemistry, University of York, Heslington, York YO10 5DD, United Kingdom

\*Corresponding author email: jcoutinho@ua.pt

#### Index

#### Experimental Details \_\_\_\_\_ S1

Chemicals

Table S1

<sup>1</sup>H-NMR

Table S2

$\sigma$ -Profile

Table S3

#### Figures \_\_\_\_\_ S4

Figures S1-S5

#### References \_\_\_\_\_ S11

## Experimental Details

### Chemicals

The substances experimentally used in this work are reported below in Table S1, along with their CAS number, supplier and purity, and their name abbreviation used throughout this work. The water used was doubly distilled, passed through a reverse osmosis system and later treated with Milli-Q (Millipore, model A10, Billerica, MA, USA). The glycerol ethers used were part of a batch synthesized in a previous work.<sup>1</sup>

**Table S1.** Name, CAS Number, supplier, purity and name abbreviation of the substances used in this work.

| Substance                                                           | CAS Number | Supplier                   | Purity (wt%)         | Abbreviation        |
|---------------------------------------------------------------------|------------|----------------------------|----------------------|---------------------|
| 3-Methoxypropane-1,2-diol                                           | 623-39-2   | Synthesized <sup>[a]</sup> | >98%                 | [1.0.0]             |
| 3-Ethoxypropane-1,2-diol                                            | 1874-62-0  | Synthesized <sup>[a]</sup> | >99%                 | [2.0.0]             |
| 3-Propoxypropane-1,2-diol                                           | 61940-71-4 | Synthesized <sup>[a]</sup> | >99%                 | [3.0.0]             |
| 3-Butoxypropane-1,2-diol                                            | 624-52-2   | Synthesized <sup>[a]</sup> | >99%                 | [4.0.0]             |
| 3-Pentoxypropane-1,2-diol                                           | 22636-32-4 | Synthesized <sup>[a]</sup> | >99%                 | [5.0.0]             |
| Gallic Acid                                                         | 149-91-7   | Merck                      | >99.5%               | GA                  |
| Syringic Acid                                                       | 530-57-4   | Acros Organics             | >98.0%               | SA                  |
| Deuterium Oxide                                                     | 7789-20-0  | Aldrich                    | 99.9% <sup>[b]</sup> | D <sub>2</sub> O    |
| 3-(trimethylsilyl)propionic-2,2,3,3-d <sub>4</sub> acid sodium salt | 24493-21-8 | Eurisotop                  | 99% <sup>[b]</sup>   | TMSP-D <sub>4</sub> |

[a] Compound belongs to a batch synthesized in a previous work<sup>1</sup>. [b] atom %.

### <sup>1</sup>H-NMR

<sup>1</sup>H-NMR spectra were acquired, at 298 K, using a Bruker Avance 300 spectrometer operating at 300.13 MHz (with chemical shifts,  $\Delta\delta$ , in ppm). All systems were prepared with a hydrotrope molar concentration of 0.4 M in a 1:1 ratio of water and deuterium oxide (using TMSP-D<sub>4</sub> as the internal reference). Five systems were prepared for each hydrotrope, varying the solute and its concentration, as described in Table S2. The aqueous solutions were prepared by adding the solute to the hydrotropic solution. All systems remained in constant agitation (1050 rpm) for 72 h using Thermomixer Eppendorf Comfort equipment, in order to ensure complete homogenization. All samples were filtered using syringe filters (0.45 mm) to remove possible suspended solid particles.

**Table S2.** Solute concentration in the hydrotropic systems (0.4 M of hydrotrope) whose  $^1\text{H-NMR}$  spectra was measured in this work.

| Hydrotrope | Gallic Acid Concentration /mol·kg <sup>-1</sup> | Syringic Acid Concentration /mol·kg <sup>-1</sup> |
|------------|-------------------------------------------------|---------------------------------------------------|
| [1.0.0]    | 0                                               | 0                                                 |
|            | 0.06                                            | 0.005                                             |
|            | 0.12                                            | 0.010                                             |
| [2.0.0]    | 0                                               | 0                                                 |
|            | 0.06                                            | 0.005                                             |
|            | 0.12                                            | 0.010                                             |
| [3.0.0]    | 0                                               | 0                                                 |
|            | 0.06                                            | 0.005                                             |
|            | 0.12                                            | 0.010                                             |
| [4.0.0]    | 0                                               | 0                                                 |
|            | 0.06                                            | 0.008                                             |
|            | 0.12                                            | 0.013                                             |
| [5.0.0]    | 0                                               | 0                                                 |
|            | 0.06                                            | 0.010                                             |
|            | 0.12                                            | 0.018                                             |

### $\sigma$ -Profile

Each molecule (either solute or hydrotrope) was optimized using TURBOMOLE, through its interface TmoleX, by adopting the TZVP template available in the software package.<sup>2</sup> This template uses a def-TZVP basis set for all atoms, a DFT with the B-P86 functional and the COSMO solvation model (continuum with infinite permittivity). From the molecule file so obtained, the  $\sigma$ -profile of the molecule was computed using the COSMOtherm software with the BP\_TZVP\_C30\_1701 parametrization.<sup>3,4</sup> For chloride-based ionic liquids, the cation was optimized separately from the chloride anion. The apolar factor of the ionic liquid is obtained by summing the apolar factors of the cation and of the anion.

Note that, unlike for the glycerol ether hydrotrope series, the hydrotrope extent of some chloride-based ionic liquids does not correlate well with the corresponding apolar factor (Figure S4). This is most likely due to the role of the chloride ion, which may stay solvated or accumulate around the solute-cation cluster for charge stabilization.

**Table S3.** *Apolar Factor of substances and ions used in the literature as hydrotropes.*

| Substance/Ion                 | Apolar Factor<br>( $\cdot 10^3$ ) | Substance/Ion | Apolar Factor<br>( $\cdot 10^3$ ) |
|-------------------------------|-----------------------------------|---------------|-----------------------------------|
| 1-ethyl-3-methylimidazolium   | 0.4755                            | Chloride      | 0                                 |
| 1-butyl-3-methylimidazolium   | 0.7120                            | Gallic Acid   | 0.4981                            |
| 1-hexyl-3-methylimidazolium   | 0.9684                            | Syringic Acid | 0.7235                            |
| 1-octyl-3-methylimidazolium   | 1.2264                            | [0.0.0]       | 0.3352                            |
| 1-butyl-3-methylpyridinium    | 0.8495                            | [1.0.0]       | 0.5041                            |
| 1-butyl-1-methylpiperidinium  | 0.7764                            | [2.0.0]       | 0.6481                            |
| 1-butyl-1-methylpyrrolidinium | 0.6958                            | [3.0.0]       | 0.7820                            |
| Tetrabutylammonium            | 1.6684                            | [4.0.0]       | 0.9117                            |
| Tetrabutylphosphonium         | 1.7036                            | [5.0.0]       | 1.0406                            |
| Cholinium                     | 0.2170                            | [1.0.1]       | 0.6828                            |
| Sodium                        | 0                                 | [2.0.2]       | 0.9636                            |

## Figures

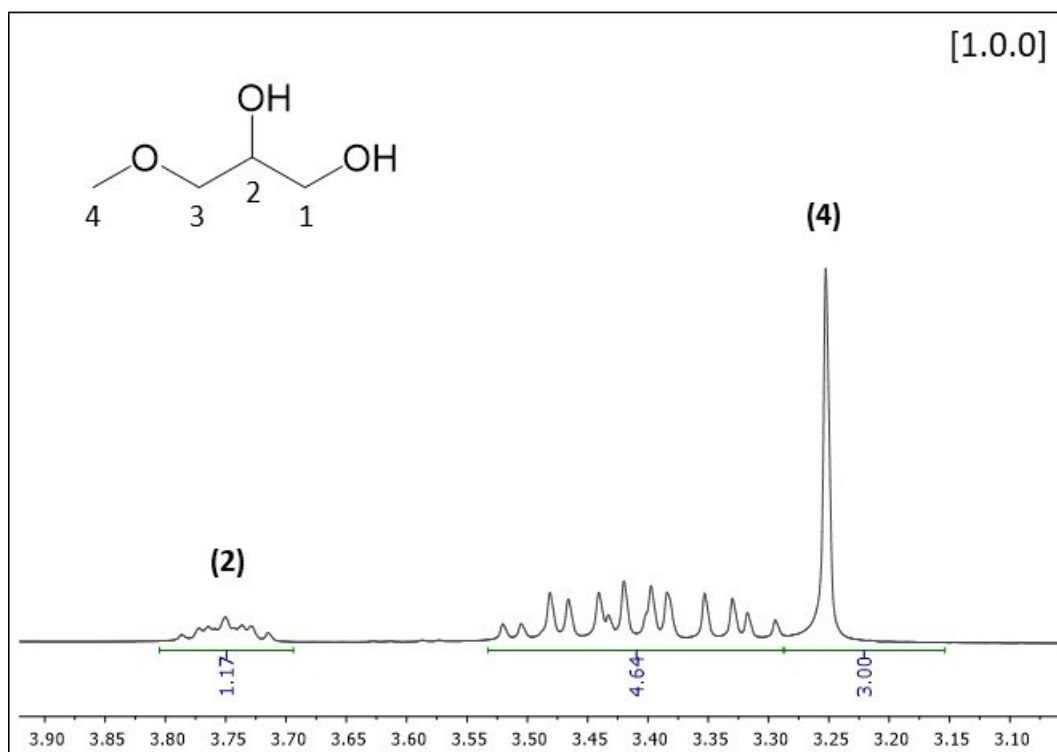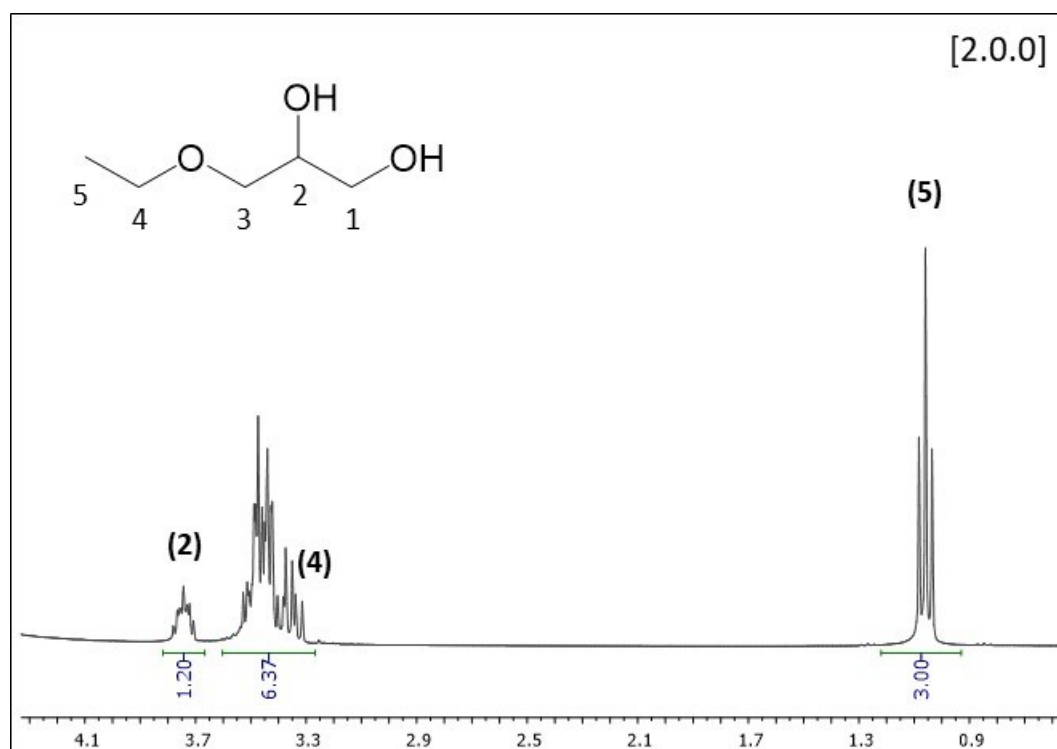

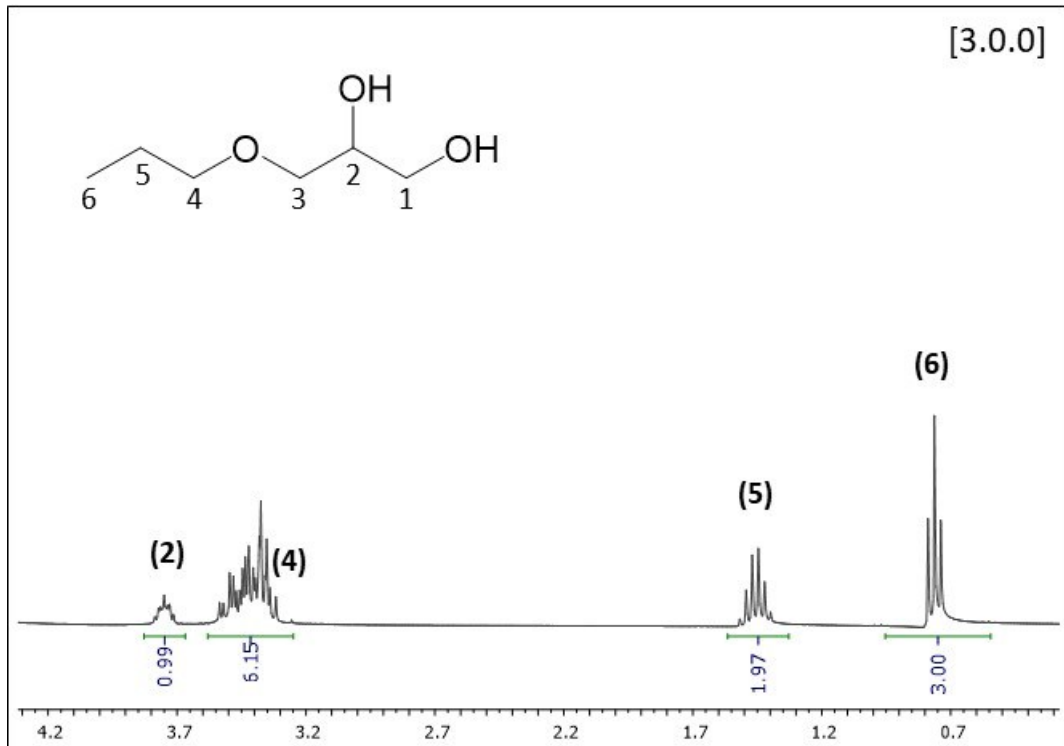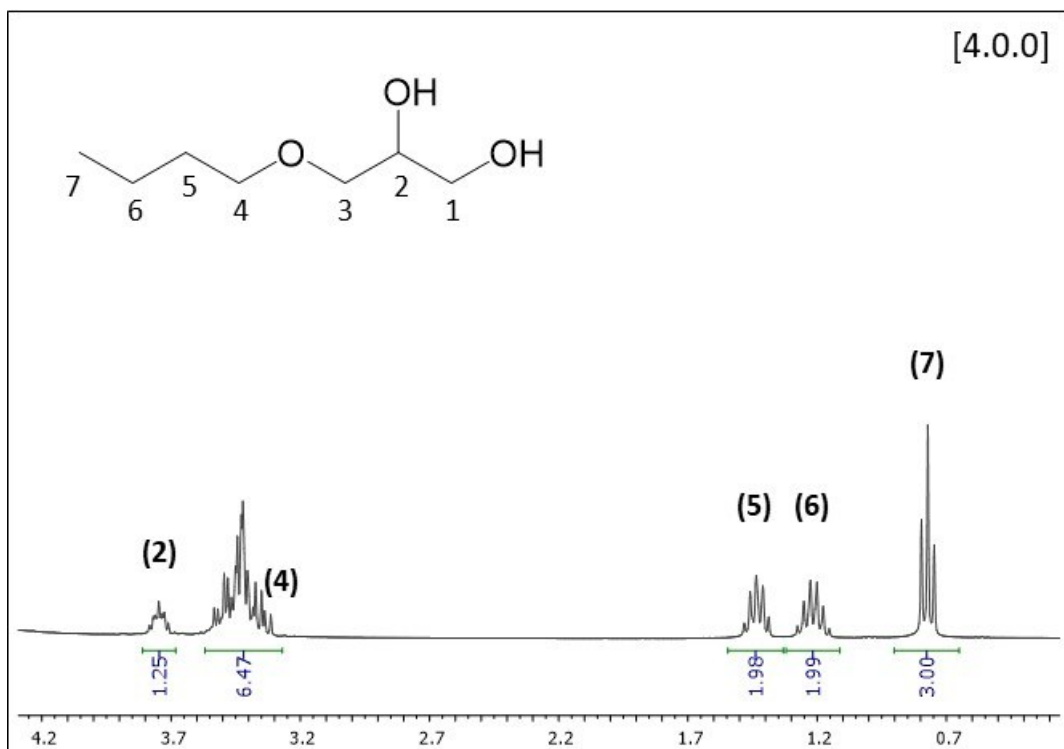

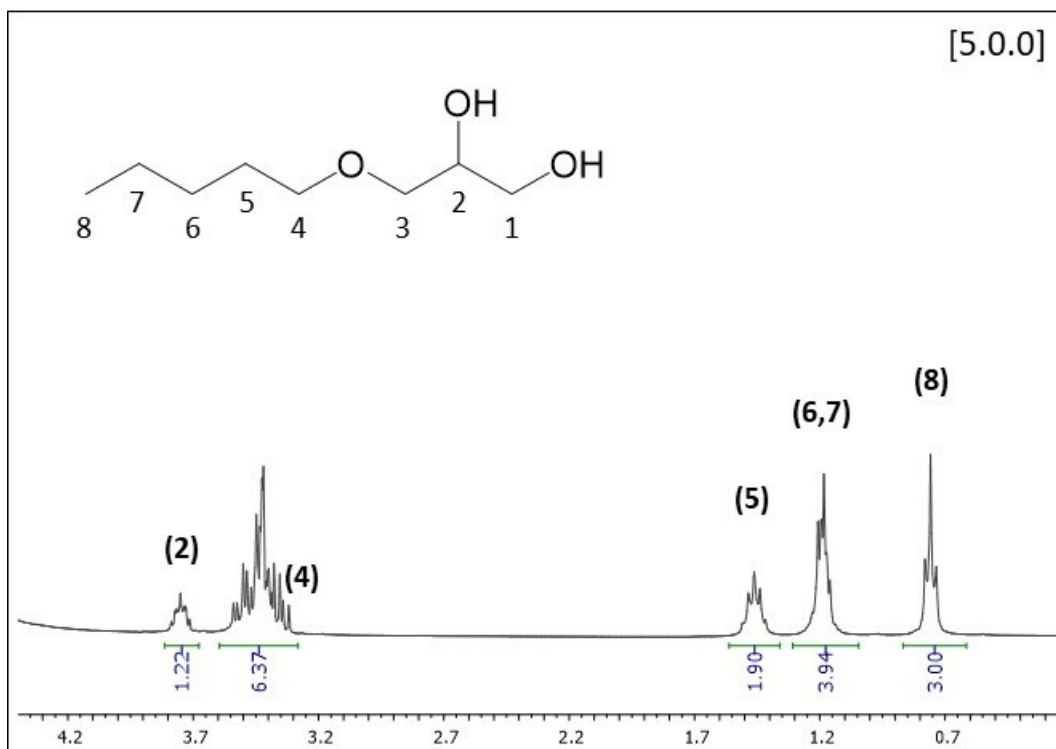

**Figure S1.** <sup>1</sup>H-NMR spectra for aqueous solutions of monoalkylglycerol ethers (0.4 mol/kg concentration) in the chemical shift window used in this work. From top to bottom, [1.0.0], [2.0.0], [3.0.0], [4.0.0] and [5.0.0], with the structure of each substance reported as inset. Signaled peaks are those used in this work, with the number matching the number sequence of the inset structure. Chemical shifts (x-axis) are reported in ppm.

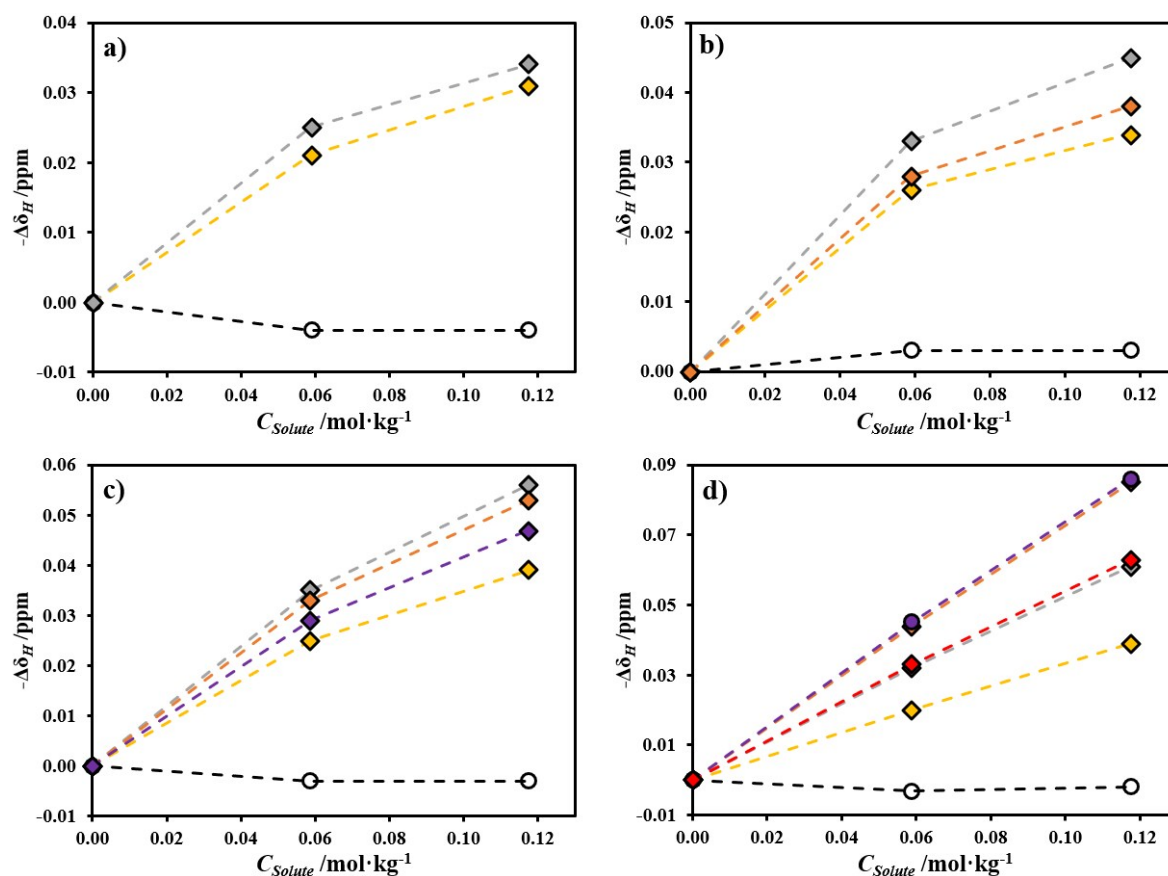

**Figure S2.** Change in chemical shift of the protons ( $-\Delta\delta_H$ ) associated to water and several methyl groups of a) [1.0.0], b) [2.0.0], c) [3.0.0] and d) [5.0.0] dissolved in water (0.4 mol/kg) as a function of gallic acid concentration. Similar data for [4.0.0] is reported in the main text (Figure 1). Legend: -○- water; -◇- 2nd carbon; -◇- 4th carbon; -◇- 5th carbon; -◇- 6th carbon; -◇- 7th carbon; -◇- 8th carbon. For [5.0.0] the peaks from the hydrogens of the 6th and 7th carbon are undistinguishable and are represented as -●-.



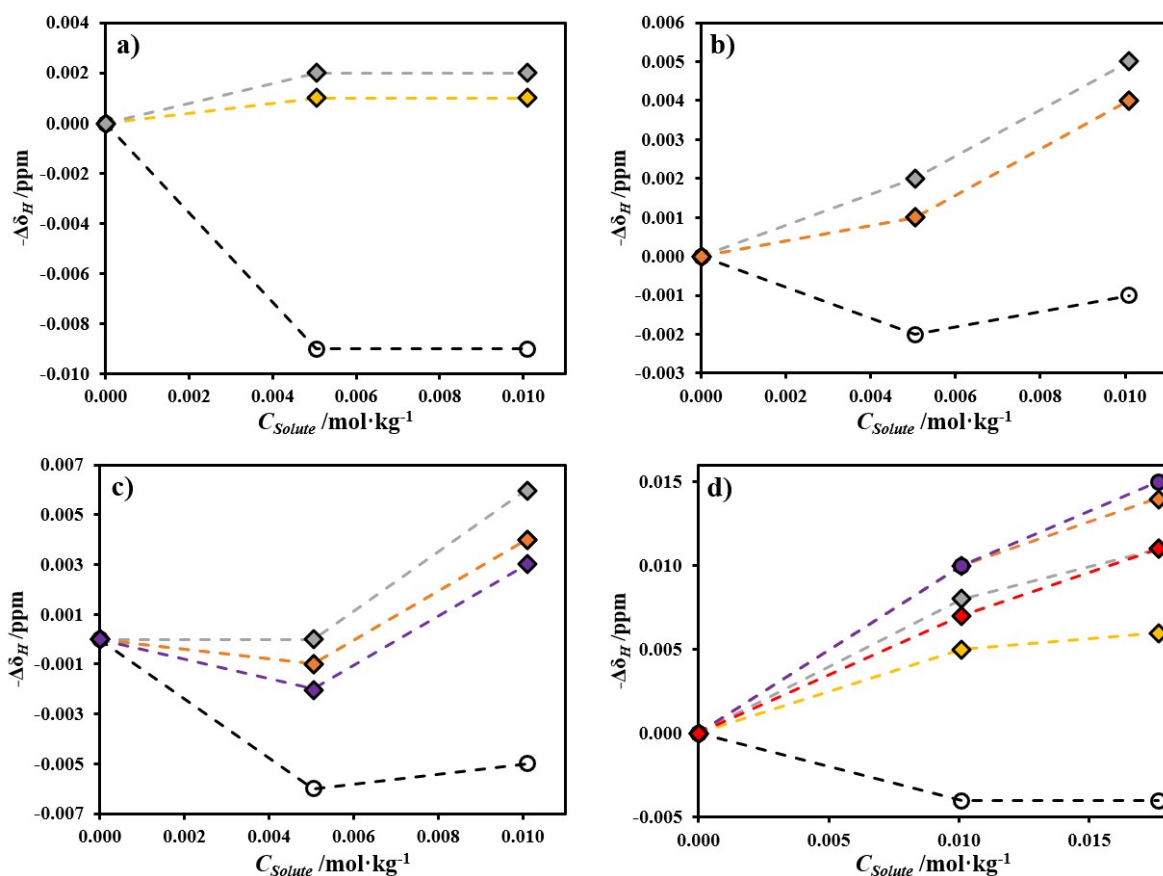

**Figure S3.** Change in chemical shift of the protons ( $-\Delta\delta_H$ ) associated to water and several methyl groups of a) [1.0.0], b) [2.0.0], c) [3.0.0] and d) [5.0.0] dissolved in water (0.4 mol/kg) as a function of syringic acid concentration. Similar data for [4.0.0] is reported in the main text (Figure 1). Legend:  $-\circ-$  water;  $-\diamond-$  2nd carbon;  $-\blacklozenge-$  4th carbon;  $-\blacklozenge-$  5th carbon;  $-\blacklozenge-$  6th carbon;  $-\blacklozenge-$  7th carbon;  $-\blacklozenge-$  8th carbon. For [5.0.0] the peaks from the hydrogens of the 6th and 7th carbon are undistinguishable and are represented as  $-\bullet-$ .

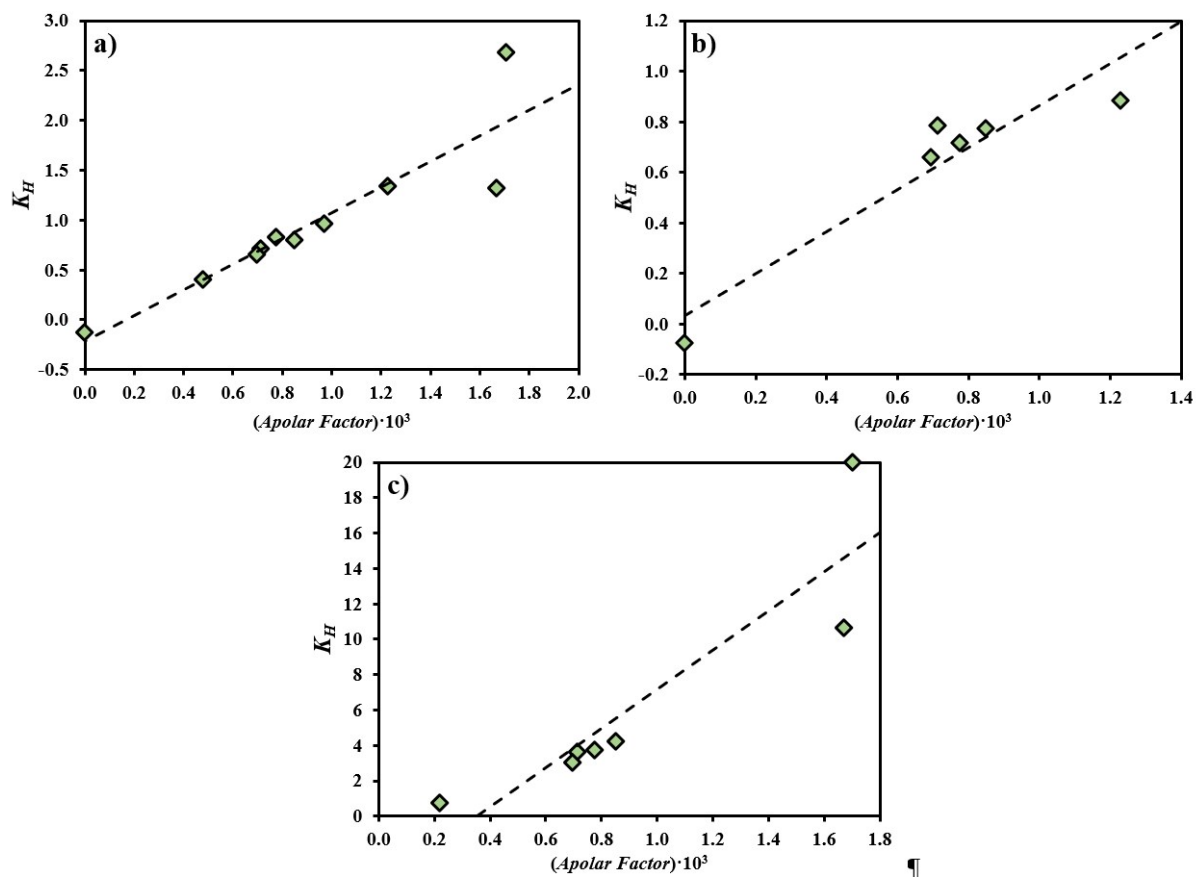

**Figure S4.** Setschenow constants of a) vanillin,<sup>5</sup> b) gallic acid<sup>5</sup> and c) ibuprofen<sup>6</sup> for chloride-based ionic liquid hydrotropic systems as a function of the apolar factor of the ionic liquid. The dashed lines are the straight lines fitted to the data using the least squares method.

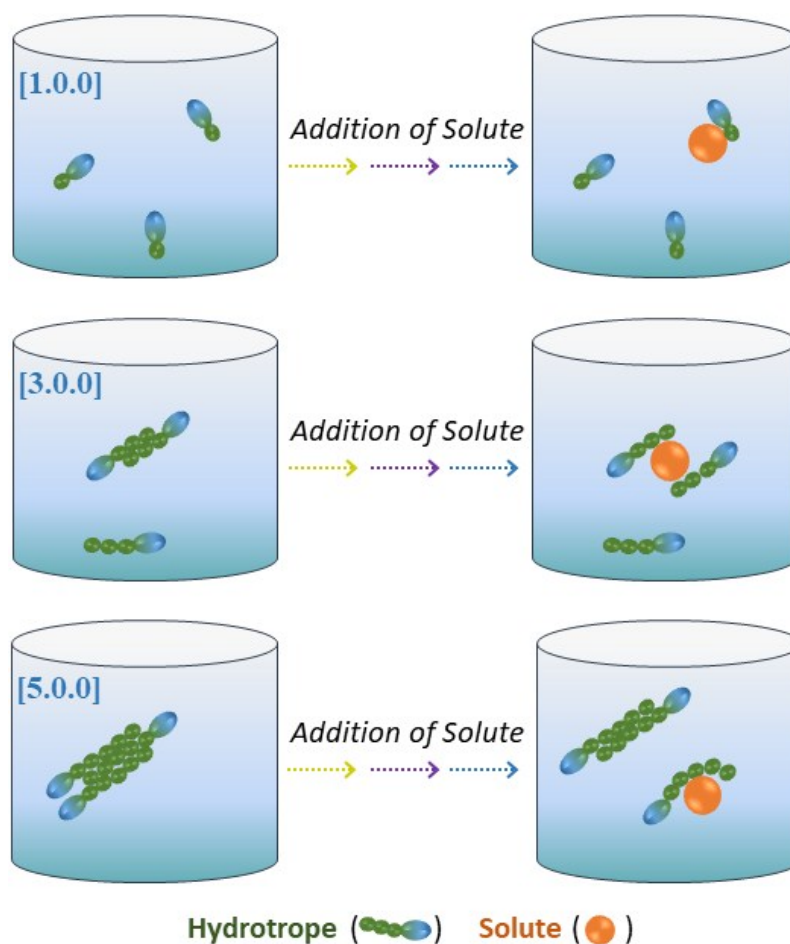

**Figure S5.** Schematic illustration of the hydrotropy mechanism, evidencing the main findings in this work. In the first case, apolarity of the hydrotrophe is small and the driving force for aggregation is low; in the second case, apolarity of the hydrotrophe is equal to that of the solute and the driving force for aggregation is maximized, resulting in more hydrotrophe molecules aggregated around the solute; in the third case, apolarity of the hydrotrophe is greater than that of the solute and, thus, driving force for hydrotrophe-hydrotrophe aggregation is larger than that of hydrotrophe-solute aggregation.

## References

- 1 B. P. Soares, D. O. Abranches, T. E. Sintra, A. Leal-Duaso, J. I. García, E. Pires, S. Shimizu, S. P. Pinho and J. A. P. Coutinho, *ACS Sustain. Chem. Eng.*, 2020, **8**, 5742–5749.
- 2 TURBOMOLE V7.1 2016, a development of University of Karlsruhe and Forschungszentrum Karlsruhe GmbH, 1989-2007, TURBOMOLE GmbH, since 2007; available from <http://www.turbomole.com>.
- 3 COSMOtherm, Release 19; COSMOlogic GmbH & Co. KG, <http://www.cosmologic.de>.
- 4 F. Eckert and A. Klamt, *AIChE J.*, 2002, **48**, 369–385.
- 5 A. F. M. Cláudio, M. C. Neves, K. Shimizu, J. N. Canongia Lopes, M. G. Freire and J. A. P. Coutinho, *Green Chem.*, 2015, **17**, 3948–3963.
- 6 T. E. Sintra, K. Shimizu, S. P. M. Ventura, S. Shimizu, J. N. Canongia Lopes and J. A. P. Coutinho, *Phys. Chem. Chem. Phys.*, 2018, **20**, 2094–2103.
